# Supplementary material
Source: publisher figshare collection journal article supplement (https://acs.figshare.com/ndownloader/files/13063910)
Supplement: Supplementary file 1 [file 13063910]

**Supporting Information for**

**Mesoporous ZnMn<sub>2</sub>O<sub>4</sub> microtubules derived from a biomorphic strategy for high performance lithium/sodium ion batteries**

Xiangwei Luo <sup>a</sup>, Xiuyun Zhang <sup>a</sup>, Lin Chen <sup>b</sup>, Lin Li <sup>a</sup>, Guisheng Zhu <sup>a</sup>, Guangcun Chen <sup>c</sup>, Dongliang Yan <sup>a,\*</sup>, Huarui Xu <sup>a</sup>, Aibing Yu <sup>d</sup>

<sup>a</sup> *Guangxi Key Laboratory of Information Materials, Guilin University of Electronic Technology, Guilin 541004, PR China*

<sup>b</sup> *Department of Material and Chemistry Engineering, Pingxiang University, Pingxiang 337055, PR China*

<sup>c</sup> *Suzhou Institute of Nano-Tech and Nano-Bionics, Chinese Academy of Sciences, Suzhou 215123, PR China*

<sup>d</sup> *Department of Chemical Engineering, Monash University, Clayton, Vic 3800, Australia*

Corresponding author

E-mail addresses: dlyan@guet.edu.cn (DL Yan)

Tel.: +86 773 2291159

Fax.: +86 773 2191903

## Experimental details

The ZMO-MT is prepared via a biomorphic route as illustrated in Figure 1. In a typical synthesis process, both 1 mmol  $\text{Zn}(\text{CH}_3\text{COO})_2 \cdot 2\text{H}_2\text{O}$  and 2 mmol  $\text{Mn}(\text{CH}_3\text{COO})_2 \cdot 4\text{H}_2\text{O}$  were first dissolved in 15 mL deionized water, followed by constant magnetic stirring for 1 h to obtain a transparent solution. Next, 0.5 g piece of natural cotton was immersed in the solution and the wet cotton was dried at 75 °C for overnight. The ZMO-MT was finally obtained by calcination of the precursor at 700 °C for 3h in air atmosphere by heating at the rate of 2 °C min<sup>-1</sup>. For comparison, bulk  $\text{ZnMn}_2\text{O}_4$  was synthesized in a similar procedure to the preparation of ZMO-MT, but without using cotton.

Scanning electron microscope (SEM, Tecnai-450, FEI), transmission electron microscope (TEM, Talos F200X, FEI), infrared spectroscopy (IR) (TENSOR27 spectrophotometer, Bruker) and X-ray diffraction diffractometer (XRD, D8-Advance, Bruker) were used to study the structure and morphologies of the sample. The  $2\theta$  ranges from 10° to 80° with a scan rate of 4°/min and a step width of 0.02°. The valance states of ZMO-MT were investigated by X-ray photoelectron spectroscopy (XPS, Escalab 250Xi, Thermo Fisher). Thermogravimetric analysis (TG, Netzsch STA-449F3) was conducted in air between room temperature and 800 °C while heating at a rate of 10 °C min<sup>-1</sup>. The Brunauer-Emmett-Teller (BET) surface area and pore size distribution of sample were recorded by a surface area analyzer (ASAP 2020 HD88, Micromeritics).

The lithium/sodium storage performances of the ZMO-MT and bulk  $\text{ZnMn}_2\text{O}_4$  were studied using CR2032 coin-type cells. The working electrodes were obtained as follows. First, ZMO (70 wt%), acetylene black (20 wt%) and polyvinylidene fluoride

(10 wt%) were mixed in N-Methyl pyrrolidone (NMP) solvent, and then, the resulting slurry was used to coat a Cu foil, which was dried at 80 °C for 12h in a vacuum atmosphere. Typically, the loading mass of the active materials is about 1.8-2.3 mg/cm<sup>2</sup>. LIBs were prepared in following manner: as the anode, the as-prepared working electrode was used; as the counter, a metallic lithium was used; as the separator, a Celgard Brand polymer membrane was used; and as the electrolyte, a solution of 1M LiPF<sub>6</sub> dissolved in a mixture of ethylene carbonate (EC) and diethyl carbonate (DEC) (1:1, volume ratio) was used. SIBs were prepared as follows: as the counter, a sodium foil was used; as the separator, a Whatman glass microfiber filters membrane was used; and as the electrolyte, a solution of 1M NaClO<sub>4</sub> dissolved in a mixture of ethylene carbonate (EC) and propylene carbonate (PC) (1:1, volume ratio) with 5% fluoroethylene carbonate (FEC) was used. The cyclic voltammograms and galvanostatic charge-discharge data of the sample were recorded in the potential range of 0.01 to 3.00 V (vs. Li<sup>+</sup>/Li or Na<sup>+</sup>/Na) by an electrochemical workstation (CHI 660E, Chenhua) and a battery testing system (CT 2001A, Land), respectively.

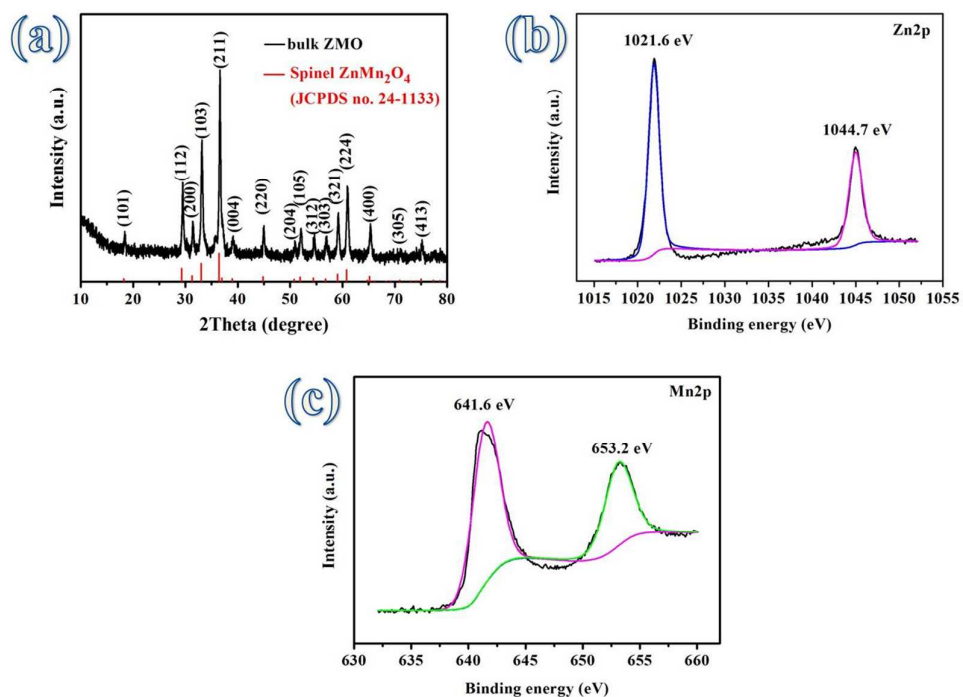

**Figure S1** (a) XRD pattern; and (b) XPS spectrum of Zn2p, (c) Mn2p for bulk ZnMn<sub>2</sub>O<sub>4</sub>

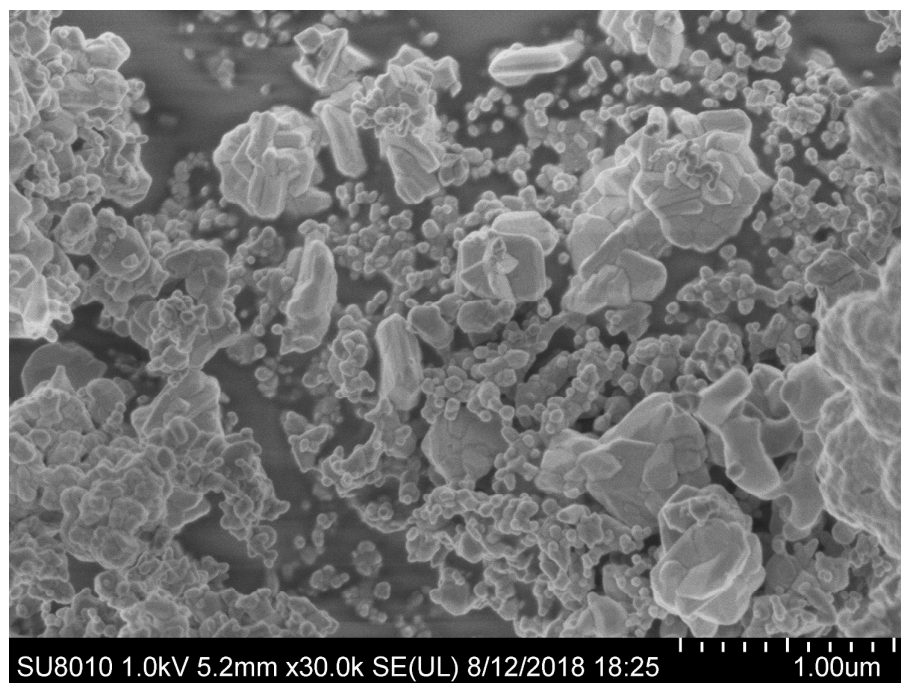

**Figure S2** SEM image of bulk ZnMn<sub>2</sub>O<sub>4</sub>

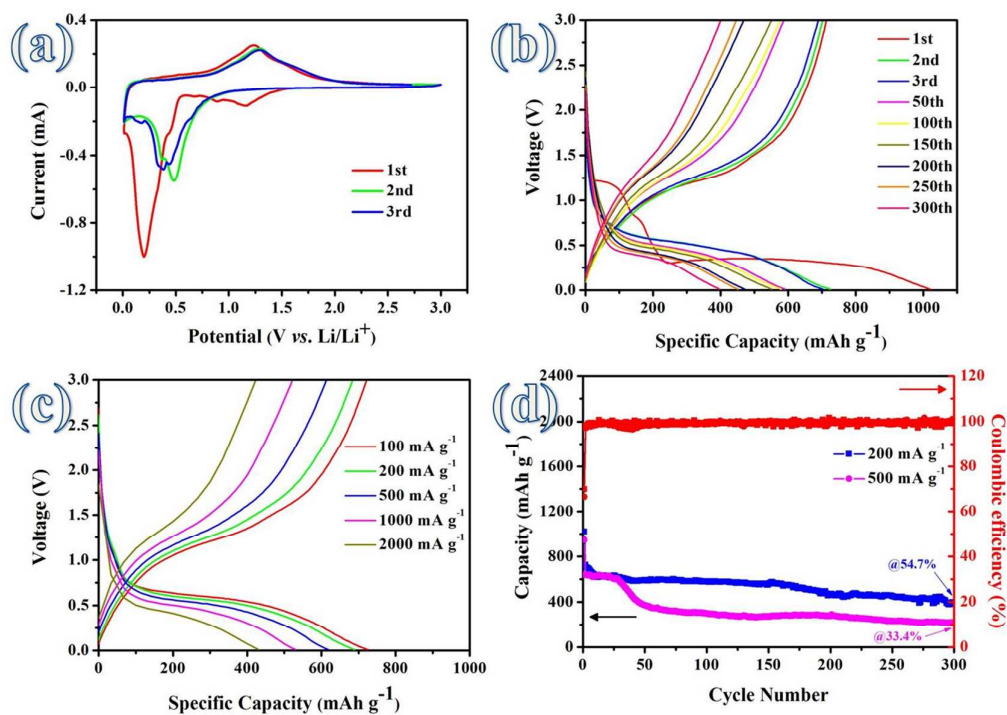

**Figure S3** Electrochemical performances in LIBs: (a) Cyclic voltammetry curves; (b) charge-discharge profiles at  $200 \text{ mA g}^{-1}$ ; (c) rate capabilities at various current densities; (d) cyclic life for bulk  $\text{ZnMn}_2\text{O}_4$

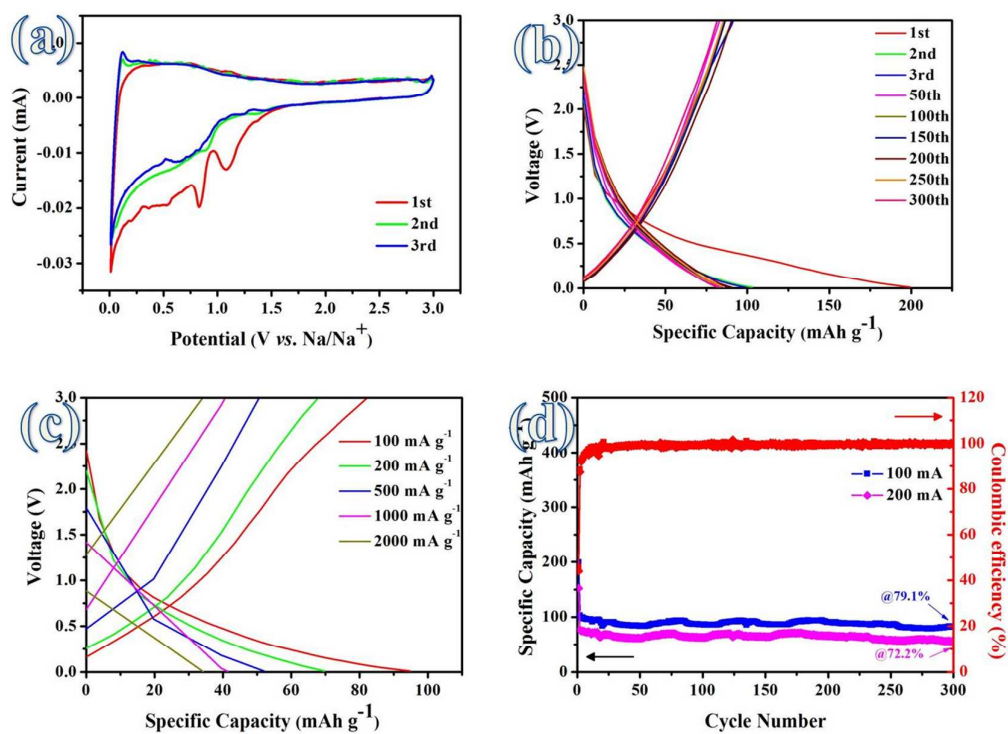

**Figure S4** Electrochemical performances in SIBs: (a) Cyclic voltammetry curves; (b) charge-discharge profiles at 100 mA g<sup>-1</sup>; (c) rate capabilities at various current densities; (d) cyclic life for bulk ZnMn<sub>2</sub>O<sub>4</sub>

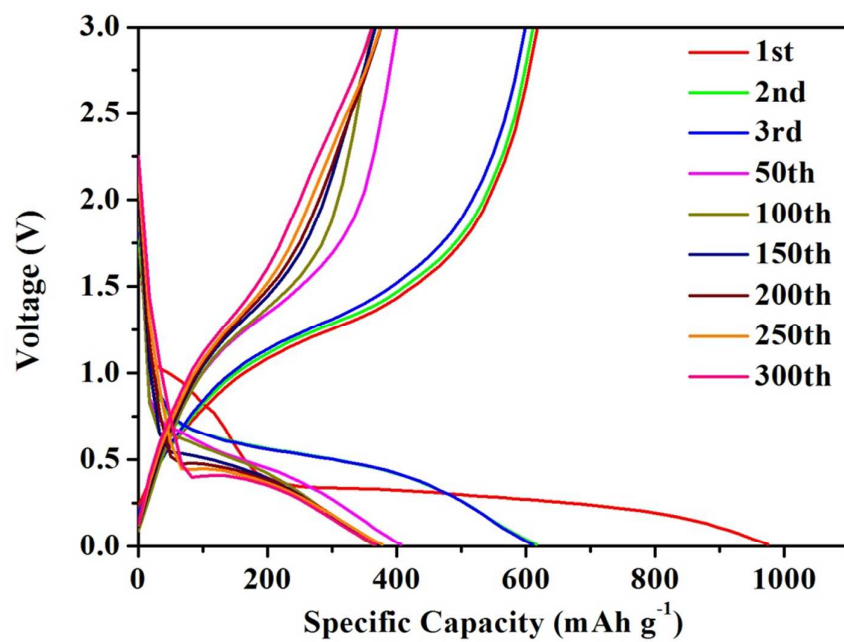

**Figure S5** Charge-discharge profiles at 1 A g<sup>-1</sup> for 300 cycles of ZMO-MT
